# Supplementary material for: Combined analysis of circulating epithelial cells and serum thyroglobulin for distinguishing disease status of the patients with papillary thyroid carcinoma
Source: PubMed Central journal article supplement (PMC4941384; doi:10.18632/oncotarget.6587), 2015-12-13
Supplement: oncotarget-07-17242-s001.pdf [file oncotarget-07-17242-s001.pdf]

## Combined analysis of circulating epithelial cells and serum thyroglobulin for distinguishing disease status of the patients with papillary thyroid carcinoma

### Supplementary Material

**Supplementary Table 1. ROC analysis of EpCAM<sup>+</sup>-CEC counts in distinguishing G3 from G2.**

| EpCAM <sup>+</sup> -CEC (cell/ml) | Sensitivity (%) | Specificity (%) |
|-----------------------------------|-----------------|-----------------|
| 6                                 | 100.0           | 19.2            |
| 7                                 | 95.5            | 26.9            |
| 8                                 | 95.5            | 30.8            |
| 9                                 | 95.5            | 34.6            |
| 10                                | 95.5            | 46.2            |
| 11                                | 90.9            | 46.2            |
| 12                                | 90.9            | 50.0            |
| 13                                | 90.9            | 53.9            |
| 14                                | 90.9            | 61.5            |
| 15                                | 90.9            | 69.2            |
| 16                                | 90.9            | 73.1            |
| 17                                | 90.9            | 76.9            |
| 18                                | 90.9            | 80.8            |
| 20                                | 90.9            | 84.6            |
| 22                                | 86.4            | 88.5            |
| 23                                | 86.4            | 92.3            |
| 24                                | 81.8            | 92.3            |
| 28                                | 81.8            | 96.2            |
| 30                                | 77.3            | 96.2            |
| 36                                | 72.7            | 96.2            |
| 45                                | 68.2            | 96.2            |
| 51                                | 68.2            | 100.0           |

**Supplementary Table 2. ROC analysis of EpCAM<sup>+</sup>-CEC counts in distinguishing G3 from G1.**

| <b>EpCAM<sup>+</sup>-CEC<br/>(cell/ml)</b> | <b>Sensitivity (%)</b> | <b>Specificity (%)</b> |
|--------------------------------------------|------------------------|------------------------|
| 6                                          | 100.0                  | 52.9                   |
| 8                                          | 95.5                   | 52.9                   |
| 9                                          | 95.5                   | 58.8                   |
| 10                                         | 95.5                   | 64.7                   |
| 12                                         | 90.9                   | 82.4                   |
| 14                                         | 90.9                   | 88.2                   |
| 15                                         | 90.9                   | 94.1                   |
| 19                                         | 90.9                   | 100.0                  |

**Supplementary Table 3. ROC analysis of TSHR<sup>+</sup>-CEC count in distinguishing G3 from G2.**

| <b>TSHR<sup>+</sup>-CEC<br/>(cell/ml)</b> | <b>Sensitivity (%)</b> | <b>Specificity (%)</b> |
|-------------------------------------------|------------------------|------------------------|
| 1                                         | 100.0                  | 3.8                    |
| 3                                         | 95.5                   | 3.8                    |
| 4                                         | 95.5                   | 7.7                    |
| 5                                         | 95.5                   | 11.5                   |
| 6                                         | 90.9                   | 11.5                   |
| 8                                         | 90.9                   | 15.4                   |
| 9                                         | 90.9                   | 19.2                   |
| 10                                        | 90.9                   | 26.9                   |
| 11                                        | 90.9                   | 30.8                   |
| 12                                        | 90.9                   | 38.5                   |
| 13                                        | 90.9                   | 42.3                   |
| 14                                        | 86.4                   | 46.2                   |
| 16                                        | 86.4                   | 50.0                   |
| 17                                        | 86.4                   | 53.9                   |
| 18                                        | 86.4                   | 57.7                   |
| 19                                        | 86.4                   | 65.4                   |
| 20                                        | 86.4                   | 69.2                   |
| 22                                        | 81.8                   | 69.2                   |
| 23                                        | 81.8                   | 73.1                   |
| 26                                        | 81.8                   | 80.8                   |
| 29                                        | 81.8                   | 88.5                   |
| 30                                        | 77.3                   | 88.5                   |
| 31                                        | 77.3                   | 92.3                   |
| 32                                        | 72.7                   | 92.3                   |
| 33                                        | 72.7                   | 96.2                   |
| 36                                        | 68.2                   | 96.2                   |
| 52                                        | 68.2                   | 100.0                  |

**Supplementary Table 4. ROC analysis of TSHR<sup>+</sup>-CEC count in distinguishing G3 from G1**

| <b>TSHR<sup>+</sup>-CEC<br/>(cell/ml)</b> | <b>Sensitivity (%)</b> | <b>Specificity (%)</b> |
|-------------------------------------------|------------------------|------------------------|
| 1                                         | 100.0                  | 11.8                   |
| 3                                         | 95.5                   | 23.5                   |
| 5                                         | 95.5                   | 29.4                   |
| 6                                         | 90.9                   | 35.3                   |
| 7                                         | 90.9                   | 41.2                   |
| 8                                         | 90.9                   | 47.1                   |
| 10                                        | 90.9                   | 52.9                   |
| 12                                        | 90.9                   | 70.6                   |
| 13                                        | 90.9                   | 76.5                   |
| 14                                        | 86.4                   | 76.5                   |
| 16                                        | 86.4                   | 82.4                   |
| 19                                        | 86.4                   | 88.2                   |
| 20                                        | 86.4                   | 94.1                   |
| 21                                        | 86.4                   | 100.0                  |
